# Supplementary material for: High-Intensity Exercise Training Alters the Effect of N-Acetylcysteine on Exercise-Related Muscle Ionic Shifts in Men
Source: MDPI journal article supplement (doi:10.3390/antiox12010053), 2022-12-27
Supplement: s1 [file s1]

# High-Intensity Exercise Training Alters the Effect of N-Acetylcysteine on Exercise-Related Muscle Ionic Shifts in Men

Anders K. Lemminger <sup>†</sup>, Matteo Fiorenza <sup>†</sup>, Kasper Eibye, Jens Bangsbo and Morten Hostrup <sup>\*</sup>

The August Krogh Section for Human Physiology, Department of Nutrition, Exercise and Sports, University of Copenhagen, 1165 Copenhagen, Denmark

<sup>\*</sup> Correspondence: mhostrup@nexs.ku.dk

<sup>†</sup> These authors contributed equally to this work.

**Table S1. Primary antibodies used for western blotting.**

| Protein Target         | Ab. cat. Number or Name | Company or Donor                               | Antibody Solution | Protein Loading Amount | Gel Type | Dilution |
|------------------------|-------------------------|------------------------------------------------|-------------------|------------------------|----------|----------|
| NKA- $\alpha_1$        | $\alpha$ 6F             | DSHB                                           | 3% BSA            | 9 $\mu$ g              | 4-15%    | 1:500    |
| NKA- $\alpha_2$        | 07-674                  | Millipore                                      | 3% BSA            | 6 $\mu$ g              | 4-15%    | 1:500    |
| NKA- $\beta_1$         | MA3-930                 | Thermo Fischer Scientific                      | 2% milk           | 6 $\mu$ g              | 4-15%    | 1:1000   |
| FXYD1                  | 13721-1AP               | Proteintech                                    | 2% milk           | 9 $\mu$ g              | 4-15%    | 1:2500   |
| Kir6.2                 | SC-11228                | Santa Cruz Biotechnology                       | 2% milk           | 12 $\mu$ g             | 4-15%    | 1:500    |
| MCT1                   | SC-14916                | Santa Cruz Biotechnology                       | 3% BSA            | 12 $\mu$ g             | 4-15%    | 1:250    |
| MCT4                   | AB3316P                 | Sigma-Aldrich                                  | 2% milk           | 12 $\mu$ g             | 4-15%    | 1:1000   |
| NHE1                   | MAB3140                 | Millipore                                      | 3% BSA            | 12 $\mu$ g             | 4-15%    | 1:500    |
| SOD1                   | 574597                  | Sigma-Aldrich                                  | 3% BSA            | 12 $\mu$ g             | 4-15%    | 1:1000   |
| SOD2                   | 06-984                  | Sigma-Aldrich                                  | 2% milk           | 12 $\mu$ g             | 4-15%    | 1:1000   |
| Catalase               | AB1877                  | Abcam                                          | 3% BSA            | 12 $\mu$ g             | 4-15%    | 1:5000   |
| GPX1                   | AB22604                 | Abcam                                          | 3% BSA            | 12 $\mu$ g             | 4-15%    | 1:1000   |
| FXYD1 unphosphorylated | AB_FXYD1-C2             | Dr. J. Randall Moorman, University of Virginia | 2% milk           | 12 $\mu$ g             | 4-15%    | 1:5000   |

NKA, Na<sup>+</sup>/K<sup>+</sup>-ATPase; FXYD1, regulatory subunit of NKA; Kir6.2, ATP-sensitive K<sup>+</sup>-channel subunit Kir6.2; MCT, monocarboxylate transporter; NHE1, Na<sup>+</sup>/H<sup>+</sup> exchanger; SOD, superoxide dismutase; GPX, glutathione peroxidase; BSA, bovine serum albumin.
